# Supplementary material
Source: PubMed Central journal article supplement (PMC5079798)
Supplement: NIHMS819207-supplement-01.pdf [file NIHMS819207-supplement-01.pdf]

**Supplementary Table I (online only).** Patient and operative characteristics with and without postoperative myocardial infarction (POMI) after carotid endarterectomy (CEA; derivation cohort 2010-2014)

|                               | Overall, %<br>(N = 36,659) | No POMI, %<br>(n = 36,338) | POMI, %<br>(n = 321) | P<br>value <sup>a</sup> |
|-------------------------------|----------------------------|----------------------------|----------------------|-------------------------|
| Age, years, mean              | 70                         | 70                         | 73                   | <.0001                  |
| Age category, years           |                            |                            |                      |                         |
| <60                           | 12.9                       | 99.5                       | 0.5                  | <.0001                  |
| 60-69                         | 31.8                       | 99.2                       | 0.8                  |                         |
| 70-79                         | 37.2                       | 99.2                       | 0.8                  |                         |
| >80                           | 18.1                       | 98.6                       | 1.4                  |                         |
| Urgency                       |                            |                            |                      |                         |
| Elective                      | 86.9                       | 99.1                       | 0.9                  | .919                    |
| Symptomatic                   | 13.1                       | 99.1                       | 0.9                  |                         |
| BMI, mean                     | 28.3                       | 28.3                       | 28.3                 | .922                    |
| BMI, quartile                 |                            |                            |                      |                         |
| ≤24                           | 25.1                       | 99.2                       | 0.8                  | .687                    |
| >24 and ≤27                   | 25.1                       | 99.0                       | 1.0                  |                         |
| >27 and ≤31                   | 25.2                       | 99.1                       | 0.9                  |                         |
| >31                           | 24.6                       | 99.2                       | 0.8                  |                         |
| Gender                        |                            |                            |                      |                         |
| Female                        | 60.3                       | 99.1                       | 0.9                  | .892                    |
| Male                          | 39.7                       | 99.1                       | 0.9                  |                         |
| Race                          |                            |                            |                      |                         |
| Nonwhite                      | 7.8                        | 99.1                       | 0.9                  | .748                    |
| White                         | 92.2                       | 99.1                       | 0.9                  |                         |
| Ethnicity                     |                            |                            |                      |                         |
| Non-Hispanic                  | 96.9                       | 99.1                       | 0.9                  | .418                    |
| Hispanic                      | 3.1                        | 98.9                       | 1.1                  |                         |
| CAD                           |                            |                            |                      |                         |
| None                          | 71.8                       | 99.3                       | 0.7                  | <.0001                  |
| Asymptomatic                  | 17.6                       | 98.7                       | 1.3                  |                         |
| Symptomatic                   | 10.6                       | 98.4                       | 1.6                  |                         |
| Stress test                   |                            |                            |                      |                         |
| Not done                      | 66.1                       | 99.2                       | 0.8                  | <.0001                  |
| Normal                        | 25.5                       | 99.4                       | 0.6                  |                         |
| Abnormal                      | 8.3                        | 98.1                       | 1.9                  |                         |
| Diabetes                      |                            |                            |                      |                         |
| None                          | 64.8                       | 99.3                       | 0.7                  | <.0001                  |
| Diet or noninsulin medication | 22.9                       | 99.0                       | 1.0                  |                         |
| Insulin                       | 12.3                       | 98.5                       | 1.5                  |                         |
| Creatinine                    |                            |                            |                      |                         |
| <1.8 mg/dL                    | 93.8                       | 99.2                       | 0.8                  | <.0001                  |
| ≥1.8 mg/dL or on dialysis     | 6.2                        | 97.8                       | 2.2                  |                         |
| CHF                           |                            |                            |                      |                         |
| None                          | 89.8                       | 99.2                       | 0.8                  | <.0001                  |
| History, asymptomatic         | 5.9                        | 98.4                       | 1.6                  |                         |
| Symptomatic                   | 4.3                        | 98.1                       | 1.9                  |                         |
| Smoking                       |                            |                            |                      |                         |
| Never                         | 24.7                       | 99.2                       | 0.8                  | .083                    |
| Prior                         | 47.4                       | 99.0                       | 1.0                  |                         |
| Current                       | 27.9                       | 99.3                       | 0.7                  |                         |
| HTN                           |                            |                            |                      |                         |
| No                            | 11.0                       | 99.4                       | 0.6                  | .034                    |
| Yes                           | 89.0                       | 99.1                       | 0.9                  |                         |
| COPD                          |                            |                            |                      |                         |
| None                          | 78.7                       | 99.1                       | 0.9                  | .699                    |
| Yes, not on medication        | 7.1                        | 99.0                       | 1.0                  |                         |
| Yes, on medication or oxygen  | 14.3                       | 99.1                       | 0.9                  |                         |

**Supplementary Table I (online only).** Continued.

|                            | Overall, %<br>(N = 36,659) | No POMI, %<br>(n = 36,338) | POMI, %<br>(n = 321) | P<br>value <sup>a</sup> |
|----------------------------|----------------------------|----------------------------|----------------------|-------------------------|
| Any prior vascular surgery |                            |                            |                      |                         |
| No                         | 74.8                       | 99.3                       | 0.7                  | <.0001                  |
| Yes                        | 25.2                       | 98.7                       | 1.3                  |                         |
| Prior CABG or PCI          |                            |                            |                      |                         |
| No                         | 66.8                       | 99.3                       | 0.7                  | <.0001                  |
| Yes                        | 33.2                       | 98.8                       | 1.2                  |                         |
| Prior neurologic event     |                            |                            |                      |                         |
| No                         | 54.4                       | 99.1                       | 0.9                  | .613                    |
| Yes                        | 45.5                       | 99.1                       | 0.9                  |                         |
| Anesthesia                 |                            |                            |                      |                         |
| Local/regional             | 9.1                        | 99.3                       | 0.7                  | .466                    |
| General                    | 90.9                       | 99.1                       | 0.9                  |                         |

BMI, Body mass index; CABG, coronary artery bypass graft; CAD, coronary artery disease; CHF, congestive heart failure; COPD, chronic obstructive pulmonary disease; HTN, hypertension; PCI, percutaneous coronary intervention.

<sup>a</sup>P value from  $\chi^2$  test for categorical variables, statistical significance at  $P < .05$ .

**Supplementary Table II (online only).** Patient and operative characteristics with and without postoperative myocardial infarction (POMI) after infrainguinal bypass (INFRA; derivation cohort 2011-2014)

|                                | Overall, %<br>(N = 14,442) | No POMI, %<br>(n = 14,042) | POMI, %<br>(n = 400) | P<br>value <sup>a</sup> |
|--------------------------------|----------------------------|----------------------------|----------------------|-------------------------|
| Urgency                        |                            |                            |                      |                         |
| Elective                       | 79.0                       | 97.5                       | 2.5                  | .0007                   |
| Symptomatic                    | 21.0                       | 96.3                       | 4.7                  |                         |
| Gender                         |                            |                            |                      |                         |
| Male                           | 67.2                       | 97.3                       | 2.7                  | .432                    |
| Female                         | 32.8                       | 97.1                       | 2.9                  |                         |
| Race                           |                            |                            |                      |                         |
| White                          | 80.8                       | 97.1                       | 2.9                  | .015                    |
| Black                          | 15.0                       | 98.0                       | 2.0                  |                         |
| Other                          | 4.2                        | 96.0                       | 4.0                  |                         |
| Ethnicity                      |                            |                            |                      |                         |
| Non-Hispanic                   | 94.7                       | 97.2                       | 2.8                  | 1.0                     |
| Hispanic                       | 5.3                        | 97.2                       | 2.8                  |                         |
| BMI, mean                      | 27.6                       | 27.6                       | 27.2                 | .162                    |
| BMI, quartile                  |                            |                            |                      |                         |
| ≤24                            | 25.1                       | 97.2                       | 2.8                  | .327                    |
| >24 and ≤27                    | 25.0                       | 96.9                       | 3.1                  |                         |
| >27 and ≤31                    | 25.0                       | 97.2                       | 2.8                  |                         |
| >31                            | 25.0                       | 97.6                       | 2.4                  |                         |
| Age, years, mean               | 66.9                       | 66.8                       | 71.2                 | <.0001                  |
| Age category, years            |                            |                            |                      |                         |
| <60                            | 25.9                       | 98.6                       | 1.4                  | <.0001                  |
| 60-69                          | 32.8                       | 97.5                       | 2.5                  |                         |
| 70-79                          | 26.9                       | 96.4                       | 3.6                  |                         |
| >80                            | 14.5                       | 95.6                       | 4.4                  |                         |
| Smoking                        |                            |                            |                      |                         |
| Never                          | 16.7                       | 96.6                       | 3.4                  | <.0001                  |
| Prior                          | 42.2                       | 96.5                       | 3.5                  |                         |
| Current                        | 41.1                       | 98.3                       | 1.7                  |                         |
| HTN                            |                            |                            |                      |                         |
| No                             | 12.2                       | 99.2                       | 0.8                  | <.0001                  |
| Yes                            | 87.8                       | 97.0                       | 3.0                  |                         |
| Diabetes                       |                            |                            |                      |                         |
| None                           | 52.0                       | 98.1                       | 1.9                  | <.0001                  |
| Diet or noninsulin medication  | 21.9                       | 97.0                       | 3.0                  |                         |
| Insulin                        | 26.1                       | 95.6                       | 4.4                  |                         |
| CAD                            |                            |                            |                      |                         |
| None                           | 70.1                       | 98.1                       | 1.9                  | <.0001                  |
| Asymptomatic                   | 22.0                       | 95.7                       | 4.3                  |                         |
| Symptomatic                    | 7.9                        | 93.9                       | 6.1                  |                         |
| Prior CABG or PCI              |                            |                            |                      |                         |
| No                             | 65.6                       | 98.1                       | 1.9                  | <.0001                  |
| Yes                            | 34.4                       | 95.6                       | 4.4                  |                         |
| CHF                            |                            |                            |                      |                         |
| None                           | 84.1                       | 97.8                       | 2.2                  | <.0001                  |
| History, asymptomatic          | 9.4                        | 94.4                       | 5.6                  |                         |
| Symptomatic                    | 6.4                        | 94.3                       | 5.7                  |                         |
| COPD                           |                            |                            |                      |                         |
| None                           | 75.3                       | 97.2                       | 2.8                  | .120                    |
| Yes, not on medication         | 8.6                        | 96.4                       | 3.6                  |                         |
| Yes, on medication/home oxygen | 16.2                       | 97.6                       | 2.4                  |                         |
| Creatinine                     |                            |                            |                      |                         |
| <1.8 mg/dL                     | 88.5                       | 97.6                       | 2.4                  | <.0001                  |
| ≥1.8 mg/dL                     | 6.2                        | 95.5                       | 4.5                  |                         |
| On dialysis                    | 5.4                        | 93.8                       | 6.2                  |                         |

**Supplementary Table II (online only).** Continued.

|                             | Overall, %<br>(N = 14,442) | No POMI, %<br>(n = 14,042) | POMI, %<br>(n = 400) | P<br>value <sup>a</sup> |
|-----------------------------|----------------------------|----------------------------|----------------------|-------------------------|
| Stress                      |                            |                            |                      |                         |
| Not done                    | 67.7                       | 97.4                       | 2.6                  | <.0001                  |
| Normal                      | 23.3                       | 97.9                       | 2.1                  |                         |
| Abnormal                    | 9.0                        | 94.4                       | 5.6                  |                         |
| Indication                  |                            |                            |                      |                         |
| Claudication                | 31.3                       | 98.8                       | 1.2                  | <.0001                  |
| Rest pain                   | 22.2                       | 97.3                       | 2.7                  |                         |
| Tissue loss                 | 35.6                       | 96.0                       | 4.0                  |                         |
| Acute ischemia              | 10.9                       | 96.4                       | 3.6                  |                         |
| Prior vascular surgery      |                            |                            |                      |                         |
| No                          | 37.2                       | 97.5                       | 2.5                  | .087                    |
| Yes                         | 62.8                       | 97.0                       | 3.0                  |                         |
| Conduit                     |                            |                            |                      |                         |
| GSV                         | 55.4                       | 97.4                       | 2.6                  | .115                    |
| Prosthetic                  | 39.4                       | 97.2                       | 2.8                  |                         |
| Other                       | 5.1                        | 96.1                       | 3.9                  |                         |
| Pathology                   |                            |                            |                      |                         |
| None/aneurysm               | 10.3                       | 98.7                       | 1.3                  | .0005                   |
| Occlusive disease           | 89.7                       | 97.1                       | 2.9                  |                         |
| Graft recipient             |                            |                            |                      |                         |
| Femoral-popliteal           | 60.1                       | 97.9                       | 2.1                  | <.0001                  |
| Infrapopliteal <sup>b</sup> | 39.9                       | 96.2                       | 3.8                  |                         |
| Anesthesia                  |                            |                            |                      |                         |
| Spinal/epidural             | 3.7                        | 97.2                       | 2.8                  | 1.0                     |
| General                     | 96.3                       | 97.2                       | 2.8                  |                         |

BMI, Body mass index; CABG, coronary artery bypass graft; CAD, coronary artery disease; CHF, congestive heart failure; COPD, chronic obstructive pulmonary disease; GSV, great saphenous vein; HTN, hypertension; PCI, percutaneous coronary intervention.

<sup>a</sup>P value from  $\chi^2$  or Fisher test as appropriate, statistical significance at  $P < .05$ .

<sup>b</sup>Infrapopliteal includes distal anastomosis to tibial peroneal trunk, anterior or posterior tibial, peroneal, or pedal artery.

## 11.e3 Bertges et al

**Supplementary Table III (online only).** Patient and operative characteristics with and without postoperative myocardial infarction (POMI) after endovascular aneurysm repair (EVAR; derivation cohort 2010-2014)

|                                       | Overall, %<br>(N = 9965) | No POMI, %<br>(n = 9837) | POMI, %<br>(n = 128) | P<br>value <sup>a</sup> |
|---------------------------------------|--------------------------|--------------------------|----------------------|-------------------------|
| Age, years, mean                      | 73.7                     | 73.6                     | 77.4                 | <.0001                  |
| Age category, years                   |                          |                          |                      |                         |
| <60                                   | 5.8                      | 99.0                     | 1.0                  |                         |
| 60-69                                 | 25.6                     | 99.3                     | 0.7                  | <.0001                  |
| 70-79                                 | 40.9                     | 98.9                     | 1.1                  |                         |
| >80                                   | 27.6                     | 97.9                     | 2.1                  |                         |
| Urgency                               |                          |                          |                      |                         |
| Elective                              | 90.6                     | 98.9                     | 1.1                  | <.0001                  |
| Symptomatic                           | 9.4                      | 96.9                     | 3.1                  |                         |
| BMI, mean                             | 27.9                     | 27.9                     | 26.7                 | .008                    |
| BMI, quartile                         |                          |                          |                      |                         |
| ≤24                                   | 24.9                     | 98.4                     | 1.6                  | .311                    |
| >24 and ≤27                           | 25.5                     | 98.8                     | 1.2                  |                         |
| >27 and ≤31                           | 25.3                     | 98.7                     | 1.3                  |                         |
| >31                                   | 24.3                     | 99.0                     | 1.0                  |                         |
| Gender                                |                          |                          |                      |                         |
| Male                                  | 80.7                     | 98.8                     | 1.2                  | .274                    |
| Female                                | 19.3                     | 98.4                     | 1.6                  |                         |
| CAD                                   |                          |                          |                      |                         |
| None                                  | 69.9                     | 99.1                     | 0.9                  | <.0001                  |
| History,<br>asymptomatic              | 22.0                     | 98.2                     | 1.8                  |                         |
| Symptomatic                           | 8.1                      | 97.0                     | 3.0                  |                         |
| Stress test                           |                          |                          |                      |                         |
| Not done                              | 59.0                     | 98.7                     | 1.3                  | .0009                   |
| Normal                                | 30.6                     | 99.1                     | 0.9                  |                         |
| Abnormal                              | 10.4                     | 97.6                     | 2.4                  |                         |
| Diabetes                              |                          |                          |                      |                         |
| No                                    | 80.0                     | 98.9                     | 1.1                  | .015                    |
| Yes                                   | 20.0                     | 98.1                     | 1.9                  |                         |
| Creatinine                            |                          |                          |                      |                         |
| <1.8 mg/dL                            | 93.2                     | 98.9                     | 1.1                  | <.0001                  |
| ≥1.8 mg/dL or<br>on dialysis          | 6.8                      | 96.8                     | 3.2                  |                         |
| CHF                                   |                          |                          |                      |                         |
| History,<br>asymptomatic              | 95.4                     | 98.9                     | 1.1                  | <.0001                  |
| Symptomatic                           | 4.6                      | 95.2                     | 4.8                  |                         |
| Smoking                               |                          |                          |                      |                         |
| Never                                 | 14.1                     | 98.4                     | 1.6                  | .333                    |
| Prior                                 | 54.2                     | 98.7                     | 1.3                  |                         |
| Current                               | 31.7                     | 98.9                     | 1.1                  |                         |
| HTN                                   |                          |                          |                      |                         |
| No                                    | 16.0                     | 98.9                     | 1.1                  | .632                    |
| Yes                                   | 84.0                     | 98.7                     | 1.3                  |                         |
| COPD                                  |                          |                          |                      |                         |
| No                                    | 68.3                     | 98.9                     | 1.1                  | .023                    |
| Yes, not on<br>medication             | 10.1                     | 98.0                     | 2.0                  |                         |
| Yes, on<br>medication/<br>home oxygen | 21.7                     | 98.4                     | 1.6                  |                         |
| Prior aortic surgery                  |                          |                          |                      |                         |
| No                                    | 95.6                     | 98.7                     | 1.3                  | 1.0                     |
| Yes                                   | 4.4                      | 98.6                     | 1.4                  |                         |
| History of peripheral bypass          |                          |                          |                      |                         |
| No                                    | 96.7                     | 98.8                     | 1.2                  | .101                    |
| Yes                                   | 3.3                      | 97.6                     | 2.4                  |                         |

**Supplementary Table III (online only).** Continued.

|                      | Overall, %<br>(N = 9965) | No POMI, %<br>(n = 9837) | POMI, %<br>(n = 128) | P<br>value <sup>a</sup> |
|----------------------|--------------------------|--------------------------|----------------------|-------------------------|
| Maximum diameter, mm |                          |                          |                      |                         |
| <55                  | 53.1                     | 99.1                     | 0.9                  | <.0001                  |
| 55-60                | 22.6                     | 98.9                     | 1.1                  |                         |
| >60                  | 24.3                     | 97.8                     | 2.2                  |                         |
| Anesthesia           |                          |                          |                      |                         |
| Local/regional       | 8.1                      | 98.4                     | 1.6                  | .492                    |
| General              | 91.9                     | 98.7                     | 1.3                  |                         |

BMI, Body mass index; CAD, coronary artery disease; CHF, congestive heart failure; COPD, chronic obstructive pulmonary disease; HTN, hypertension.

<sup>a</sup>P value from  $\chi^2$  or Fisher test as appropriate, statistical significance at  $P < .05$ .

**Supplementary Table IV (online only).** Patient and operative characteristics with and without postoperative myocardial infarction (POMI) after open abdominal aortic aneurysm (OAAA) repair (derivation cohort 2010-2014)

|                                       | Overall, %<br>(N = 3414) | No POMI, %<br>(n = 3244) | POMI, %<br>(n = 170) | P<br>value <sup>a</sup> |
|---------------------------------------|--------------------------|--------------------------|----------------------|-------------------------|
| Age, years, mean                      | 69.5                     | 69.3                     | 72.3                 | <.0001                  |
| Age category, years                   |                          |                          |                      |                         |
| <60                                   | 12.0                     | 97.3                     | 2.7                  | .005                    |
| 60-69                                 | 36.1                     | 95.9                     | 4.1                  |                         |
| 70-79                                 | 39.8                     | 94.3                     | 5.7                  |                         |
| >80                                   | 12.0                     | 92.7                     | 7.3                  |                         |
| Urgency                               |                          |                          |                      |                         |
| Elective                              | 85.8                     | 95.3                     | 4.7                  | .149                    |
| Symptomatic                           | 14.2                     | 93.6                     | 6.4                  |                         |
| BMI, mean                             | 27.2                     | 27.2                     | 26.4                 | .067                    |
| BMI quartile                          |                          |                          |                      |                         |
| <23.7                                 | 24.1                     | 93.4                     | 6.6                  | .019                    |
| 23.7-26.7                             | 25.2                     | 94.8                     | 5.2                  |                         |
| 26.8-30.3                             | 26.1                     | 95.1                     | 4.9                  |                         |
| >30.3                                 | 24.5                     | 96.8                     | 3.2                  |                         |
| Gender                                |                          |                          |                      |                         |
| Female                                | 72.7                     | 94.9                     | 5.1                  | .607                    |
| Male                                  | 27.3                     | 95.4                     | 4.6                  |                         |
| Race                                  |                          |                          |                      |                         |
| Nonwhite                              | 8.3                      | 91.8                     | 8.2                  | .016                    |
| White                                 | 91.7                     | 95.3                     | 4.7                  |                         |
| CAD                                   |                          |                          |                      |                         |
| None                                  | 73.6                     | 95.5                     | 4.5                  | .067                    |
| Asymptomatic                          | 19.7                     | 93.6                     | 6.4                  |                         |
| Symptomatic                           | 6.7                      | 93.4                     | 6.6                  |                         |
| Stress test                           |                          |                          |                      |                         |
| Not done                              | 45.3                     | 95.5                     | 4.5                  | .091                    |
| Normal                                | 42.8                     | 95.1                     | 4.9                  |                         |
| Abnormal                              | 11.9                     | 92.8                     | 7.2                  |                         |
| Diabetes                              |                          |                          |                      |                         |
| None                                  | 85.0                     | 95.0                     | 5.0                  | .990                    |
| Any                                   | 15.0                     | 94.9                     | 5.1                  |                         |
| Creatinine                            |                          |                          |                      |                         |
| <1.8 mg/dL                            | 93.4                     | 95.5                     | 4.5                  | <.0001                  |
| ≥1.8 mg/dL or<br>on dialysis          | 6.6                      | 88.1                     | 11.9                 |                         |
| CHF                                   |                          |                          |                      |                         |
| None                                  | 93.0                     | 95.4                     | 4.6                  | .001                    |
| Any                                   | 7.0                      | 90.4                     | 9.6                  |                         |
| Smoking                               |                          |                          |                      |                         |
| Never                                 | 9.9                      | 95.0                     | 5.0                  | .101                    |
| Prior                                 | 46.6                     | 94.2                     | 5.8                  |                         |
| Current                               | 43.5                     | 95.9                     | 4.1                  |                         |
| HTN                                   |                          |                          |                      |                         |
| No                                    | 15.8                     | 96.8                     | 3.2                  | .044                    |
| Yes                                   | 84.2                     | 94.7                     | 5.3                  |                         |
| COPD                                  |                          |                          |                      |                         |
| No                                    | 68.0                     | 95.9                     | 4.1                  | .004                    |
| Yes, not on<br>medication             | 13.5                     | 92.9                     | 7.1                  |                         |
| Yes, on<br>medication/<br>home oxygen | 18.5                     | 93.5                     | 6.5                  |                         |
| Any prior vascular surgery            |                          |                          |                      |                         |
| No                                    | 79.2                     | 95.9                     | 4.1                  | <.0001                  |
| Yes                                   | 20.8                     | 91.8                     | 8.2                  |                         |
| Prior CABG or PCI                     |                          |                          |                      |                         |
| No                                    | 70.4                     | 95.8                     | 4.2                  | .001                    |
| Yes                                   | 29.6                     | 93.1                     | 6.9                  |                         |

**Supplementary Table IV (online only).** Continued.

|                                     | Overall, %<br>(N = 3414) | No POMI, %<br>(n = 3244) | POMI, %<br>(n = 170) | P<br>value <sup>a</sup> |
|-------------------------------------|--------------------------|--------------------------|----------------------|-------------------------|
| Iliac aneurysm                      |                          |                          |                      |                         |
| No                                  | 72.4                     | 94.8                     | 5.2                  | .341                    |
| Yes                                 | 27.6                     | 95.6                     | 4.4                  |                         |
| Maximum AP<br>diameter, mm,<br>mean | 60.4                     | 60.3                     | 62.2                 | .120                    |
| Maximum AP diameter, mm             |                          |                          |                      |                         |
| ≤55                                 | 41.9                     | 96.1                     | 3.9                  | .051                    |
| 55-60                               | 35.4                     | 94.4                     | 5.6                  |                         |
| >60                                 | 22.7                     | 94.1                     | 5.9                  |                         |
| Distal anastomosis                  |                          |                          |                      |                         |
| Aorta                               | 47.0                     | 95.3                     | 4.7                  | .377                    |
| CIA                                 | 32.5                     | 95.2                     | 4.8                  |                         |
| EIA/CFA                             | 20.5                     | 94.0                     | 6.0                  |                         |
| Proximal clamp                      |                          |                          |                      |                         |
| Infrarenal                          | 57.9                     | 95.8                     | 4.2                  | .0003                   |
| Above one<br>renal artery           | 13.5                     | 94.8                     | 5.2                  |                         |
| Above two<br>renal arteries         | 21.1                     | 95.1                     | 4.9                  |                         |
| Supraceliac                         | 7.5                      | 89.5                     | 10.5                 |                         |
| Anesthesia                          |                          |                          |                      |                         |
| General                             | 53.3                     | 94.9                     | 5.1                  | .756                    |
| General and<br>epidural             | 46.7                     | 95.2                     | 4.8                  |                         |

AP, Anteroposterior; BMI, body mass index; CABG, coronary artery bypass graft; CAD, coronary artery disease; CFA, common femoral artery; CHF, congestive heart failure; CIA, common iliac artery; COPD, chronic obstructive pulmonary disease; EIA, external iliac artery; HTN, hypertension; PCI, percutaneous coronary intervention.

<sup>a</sup>P value from  $\chi^2$  or Fisher test as appropriate, statistical significance at  $P < .05$ .
